# Supplementary material
Source: PubMed Central journal article supplement (PMC5607781)
Supplement: NIHMS848016-supplement-Supporting_Information.pdf [file NIHMS848016-supplement-Supporting_Information.pdf]

## Supporting information

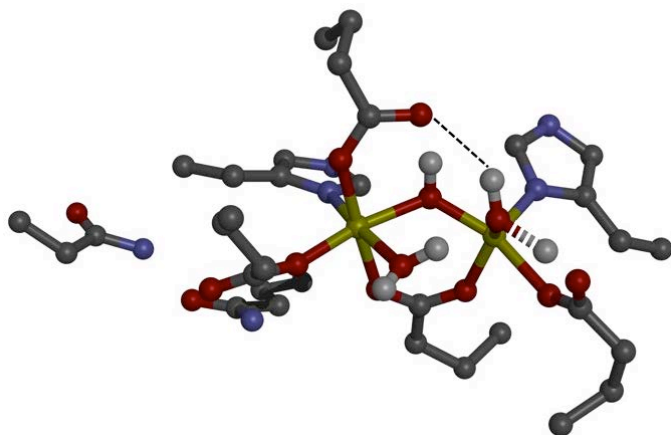

**Figure S1.** Optimized geometry from the  $(\mu\text{-OH})(\mu\text{-OH}_2)$  initial structure of MMO using truncation scheme #2. H, C, N, O, and Fe atoms are colored in white, gray, blue, red, and yellow, respectively, and the amino acid hydrogen atoms are omitted for clarity.

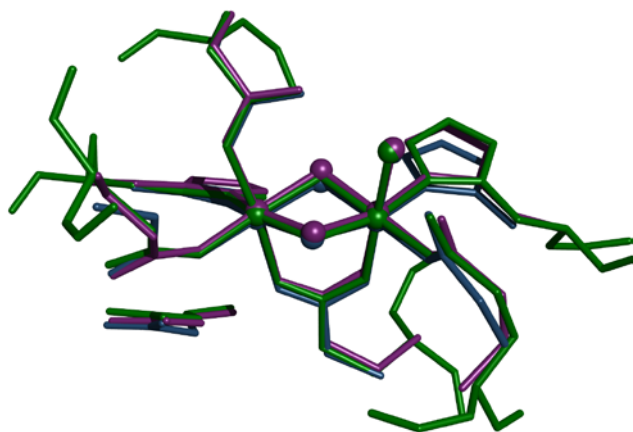

**Figure S2.** Overlay of models #1 (green), #2 (magenta), and #3 (blue). For clarity, all hydrogen atoms are omitted.
